# Supplementary material
Source: PubMed Central journal article supplement (PMC7323458)
Supplement: NIHMS1596415-supplement-SI.pdf [file NIHMS1596415-supplement-SI.pdf]

# Molecular basis for interactions between an acyl carrier protein and a ketosynthase

## Supplementary Information

Jacob C. Milligan<sup>1,5</sup>, D. John Lee<sup>2,5</sup>, David R. Jackson<sup>3,5</sup>, Andrew J. Schaub<sup>3</sup>, Joris Beld<sup>2</sup>, Jesus F. Barajas<sup>1</sup>, Joseph J. Hale<sup>2</sup>, Ray Luo<sup>1</sup>, Michael D. Burkart<sup>2\*</sup>, Shiou-Chuan Tsai<sup>1,3,4\*</sup>

**Author affiliation:** <sup>1</sup>Department of Molecular Biology and Biochemistry, University of California, Irvine, CA, USA. <sup>2</sup>Department of Chemistry and Biochemistry, University of California, San Diego, La Jolla, CA, USA. <sup>3</sup>Department of Chemistry, University of California, Irvine, CA, USA. <sup>4</sup>Department of Pharmaceutical Sciences, University of California, Irvine, CA, USA. <sup>5</sup>These authors contributed equally to this work. \*email [sctsai@uci.edu](mailto:sctsai@uci.edu) or [mburkart@ucsd.edu](mailto:mburkart@ucsd.edu).

### Manuscript information:

Formatted for re-submission to *Nature Chemical Biology* as a Brief Communication.

### Supplementary Information contents:

|                              |           |
|------------------------------|-----------|
| <b>SUPPLEMENTARY TABLES</b>  | <b>2</b>  |
| <b>SUPPLEMENTARY FIGURES</b> | <b>6</b>  |
| <b>SUPPLEMENTARY MOVIES</b>  | <b>29</b> |

## SUPPLEMENTARY TABLES

|                                    | AcpP-FabB<br>(5KOF)                   |
|------------------------------------|---------------------------------------|
| <b>Data collection</b>             |                                       |
| Wavelength (Å)                     | 1.0                                   |
| Total reflections                  | 72648 (7131)                          |
| Unique reflections                 | 37073 (3680)                          |
| Space group                        | P 1 2 <sub>1</sub> 1                  |
| Cell dimensions                    |                                       |
| <i>a</i> , <i>b</i> , <i>c</i> (Å) | 59.33, 103.92, 83.4001                |
| $\alpha$ , $\beta$ , $\gamma$ (°)  | 90, 110.61, 90                        |
| Resolution (Å)                     | 39.2 – 2.4 (2.486 – 2.4) <sup>a</sup> |
| <u><i>R</i><sub>merge</sub></u>    | 0.04978 (0.3953)                      |
| <u><i>R</i><sub>meas</sub></u>     | 0.0704 (0.559)                        |
| <i>I</i> / $\sigma$ ( <i>I</i> )   | 7.27 (1.76)                           |
| <i>CC</i> <sub>1/2</sub>           | 0.996 (0.824)                         |
| <i>CC</i> *                        | 0.999 (0.95)                          |
| Completeness (%)                   | 100 (100)                             |
| Redundancy                         | 2.0 (1.9)                             |
| Wilson B-factor                    | 40.87                                 |
| <b>Refinement</b>                  |                                       |
| Resolution (Å)                     | 39.2 – 2.4 (2.486 – 2.4)              |
| No. reflections                    | 37044 (3669)                          |
| <u><i>R</i><sub>work</sub></u>     | 0.2080                                |
| <u><i>R</i><sub>free</sub></u>     | 0.2254                                |
| No. atoms                          |                                       |
| Protein                            | 7110                                  |
| Ligands                            | 50                                    |
| <i>B</i> factors                   |                                       |
| Protein                            | 61.77                                 |
| Ligands                            | 75.55                                 |
| Water                              | 54.44                                 |
| Ramachandran                       |                                       |
| Favored (%)                        | 93.4                                  |
| Allowed (%)                        | 6.0                                   |
| Outliers (%)                       | 0.6                                   |
| <u>R.m.s. deviations</u>           |                                       |
| Bond lengths (Å)                   | 0.006                                 |
| Bond angles (°)                    | 1.46                                  |

**Supplementary Table 1. Crystallographic data collection and refinement statistics.**

Statistics for the highest resolution shell are shown in parentheses.

| wt C <sub>8</sub> -AcpP |                    |                       | D38A C <sub>8</sub> -AcpP |                       | CSP      |
|-------------------------|--------------------|-----------------------|---------------------------|-----------------------|----------|
| Assignment              | $\delta^1\text{H}$ | $\delta^{15}\text{N}$ | $\delta^1\text{H}$        | $\delta^{15}\text{N}$ |          |
| 03I                     | 8.696              | 121.850               | 8.546                     | 122.170               | 0.111 *  |
| 04E                     | 8.656              | 118.955               | 8.435                     | 114.847               | 0.436 *  |
| 05E                     | 7.896              | 117.827               | 7.910                     | 117.618               | 0.023    |
| 06R                     | 8.395              | 120.275               | 8.360                     | 120.145               | 0.028    |
| 07V                     | 8.965              | 119.456               | 9.023                     | 119.418               | 0.041    |
| 08K                     | 8.271              | 117.389               | 8.245                     | 117.303               | 0.020    |
| 09K                     | 8.318              | 120.854               | 8.247                     | 121.267               | 0.065    |
| 10I                     | 7.659              | 119.721               | 7.760                     | 119.822               | 0.072    |
| 11I                     | 8.356              | 119.228               | 8.436                     | 119.181               | 0.057    |
| 12G                     | 8.503              | 105.573               | 8.421                     | 105.325               | 0.063    |
| 13E                     | 8.244              | 120.501               | 8.237                     | 120.547               | 0.007    |
| 14Q                     | 8.463              | 117.753               | 8.669                     | 117.155               | 0.157 *  |
| 15L                     | 8.136              | 113.771               | 8.264                     | 113.924               | 0.092    |
| 16G                     | 7.849              | 110.235               | 7.800                     | 110.242               | 0.035    |
| 17V                     | 7.924              | 114.922               | 7.903                     | 114.493               | 0.045    |
| 18K                     | 8.589              | 123.293               | 8.594                     | 123.126               | 0.017    |
| 19Q                     | 8.835              | 123.095               | 8.831                     | 123.109               | 0.003    |
| 20E                     | 9.445              | 116.889               | 9.466                     | 116.943               | 0.016    |
| 21E                     | 7.919              | 117.279               | 7.940                     | 117.229               | 0.016    |
| 22V                     | 7.576              | 122.757               | 7.596                     | 122.659               | 0.017    |
| 23T                     | 7.371              | 115.887               | 7.352                     | 115.721               | 0.021    |
| 24N                     | 8.629              | 119.086               | 8.642                     | 119.048               | 0.010    |
| 25N                     | 8.147              | 112.280               | 8.150                     | 112.200               | 0.008    |
| 26A                     | 7.349              | 123.231               | 7.372                     | 123.299               | 0.018    |
| 27S                     | 9.987              | 117.289               | 9.993                     | 117.280               | 0.004    |
| 28F                     | 7.595              | 125.331               | 7.587                     | 125.421               | 0.011    |
| 29V                     | 8.817              | 117.002               | 8.800                     | 117.013               | 0.012    |
| 30E                     | 8.342              | 117.098               | 8.326                     | 117.066               | 0.012    |
| 31D                     | 7.826              | 114.280               | 7.831                     | 114.336               | 0.007    |
| 32L                     | 7.411              | 115.707               | 7.428                     | 115.600               | 0.016    |
| 33G                     | 7.270              | 106.818               | 7.259                     | 106.727               | 0.012    |
| 34A                     | 8.512              | 123.052               | 8.566                     | 123.064               | 0.038    |
| 35D                     | 9.370              | 123.501               | 7.934                     | 123.393               | 1.015 *  |
| 36S                     | 8.691              | 113.447               | 8.775                     | 114.168               | 0.093    |
| 37L                     | 8.218              | 123.919               | 8.324                     | 122.338               | 0.174 *  |
| 38D                     | 8.379              | 120.014               | 7.586                     | 121.092               | 0.571 ** |
| 39T                     | 8.228              | 112.167               | 8.312                     | 111.067               | 0.124 *  |
| 40V                     | 7.272              | 121.431               | 7.359                     | 122.051               | 0.087    |
| 41E                     | 7.860              | 119.358               | 7.813                     | 119.381               | 0.033    |
| 42L                     | 8.450              | 121.751               | 8.340                     | 121.838               | 0.078    |
| 43V                     | 8.020              | 119.376               | 8.072                     | 119.709               | 0.049    |
| 44M                     | 7.792              | 117.246               | 7.801                     | 117.266               | 0.007    |
| 45A                     | 8.181              | 121.772               | 8.157                     | 121.955               | 0.025    |

|     |        |         |        |         |       |
|-----|--------|---------|--------|---------|-------|
| 46L | 8.430  | 120.866 | 8.432  | 120.820 | 0.005 |
| 47E | 8.743  | 120.243 | 8.715  | 120.149 | 0.022 |
| 48E | 7.896  | 117.285 | 7.904  | 117.193 | 0.011 |
| 49E | 7.990  | 120.008 | 8.038  | 119.533 | 0.058 |
| 50F | 7.840  | 111.805 | 7.843  | 111.827 | 0.003 |
| 51D | 7.909  | 122.744 | 7.923  | 122.880 | 0.017 |
| 52T | 8.083  | 112.548 | 8.093  | 112.754 | 0.022 |
| 53E | 8.156  | 122.920 | 8.087  | 122.596 | 0.058 |
| 54I | 10.406 | 129.131 | 10.382 | 129.154 | 0.017 |
| 55P |        |         |        |         |       |
| 56D | 8.950  | 125.628 | 8.961  | 125.533 | 0.012 |
| 57E | 9.299  | 116.557 | 9.311  | 116.572 | 0.009 |
| 58E | 7.259  | 116.260 | 7.260  | 116.260 | 0.001 |
| 59A | 8.219  | 123.159 | 8.284  | 123.274 | 0.047 |
| 60E | 7.609  | 112.545 | 7.626  | 112.655 | 0.016 |
| 61K | 7.064  | 114.423 | 7.085  | 114.498 | 0.017 |
| 62I | 7.672  | 123.047 | 7.688  | 123.118 | 0.013 |
| 63T | 8.083  | 112.548 | 8.021  | 112.375 | 0.047 |
| 64T | 7.272  | 110.705 | 7.237  | 110.633 | 0.026 |
| 65V | 8.040  | 121.757 | 8.023  | 121.648 | 0.016 |
| 66Q | 8.735  | 118.250 | 8.723  | 118.148 | 0.013 |
| 67A | 7.823  | 119.611 | 7.814  | 119.572 | 0.007 |
| 68A | 7.997  | 123.042 | 8.004  | 122.981 | 0.008 |
| 69I | 8.166  | 119.500 | 8.167  | 119.481 | 0.002 |
| 70D | 9.163  | 119.401 | 9.144  | 119.297 | 0.017 |
| 71Y | 8.203  | 122.028 | 8.204  | 121.890 | 0.014 |
| 72I | 8.239  | 121.178 | 8.180  | 121.275 | 0.043 |
| 73N | 8.880  | 118.545 | 8.849  | 118.456 | 0.024 |
| 74G | 7.884  | 105.384 | 7.838  | 105.132 | 0.041 |
| 75H | 7.692  | 119.015 | 7.656  | 118.397 | 0.066 |

**Supplementary Table 2. Chemical Shift Tables for wt and D38A C<sub>8</sub>-AcpP.** Chemical shift assignments are reported for wt C<sub>8</sub>-AcpP and D38A C<sub>8</sub>-AcpP (amide replacement of the phosphopantetheine thioester). CSP values between these two species are reported, indicating good chemical shift agreement between the two. \* denotes residues with a > 0.100 CSP. \*\* indicates the mutation site. 21E and 48E are aliased with each other in both species, and omitted in Figure 3.

|                                                                       | K <sub>d</sub><br>NMR Titration with FabB |             |                   | Complementation<br>UFA Fraction, 17 °C |             | Complementation<br>UFA Fraction, 25 °C |             | Complementation<br>UFA Fraction, 37 °C |             |
|-----------------------------------------------------------------------|-------------------------------------------|-------------|-------------------|----------------------------------------|-------------|----------------------------------------|-------------|----------------------------------------|-------------|
| AcpP                                                                  | <b>wt</b>                                 | <b>D38A</b> | AcpP              | <b>wt</b>                              | <b>D38A</b> | <b>wt</b>                              | <b>D38A</b> | <b>wt</b>                              | <b>D38A</b> |
| M <sub>Kd</sub>                                                       | 37.6 μM                                   | 167 μM      | M <sub>UFA</sub>  | 0.519                                  | 0.428       | 0.473                                  | 0.393       | 0.417                                  | 0.400       |
| SD <sub>Kd</sub>                                                      | 6.6 μM                                    | 15 μM       | SD <sub>UFA</sub> | 0.019                                  | 0.016       | 0.005                                  | 0.010       | 0.002                                  | 0.004       |
| N                                                                     | 10 observations each                      |             | N                 | 4 cultures each                        |             | 4 cultures each                        |             | 4 cultures each                        |             |
| Two-tailed unpaired t-test (Student's test)                           |                                           |             |                   |                                        |             |                                        |             |                                        |             |
| t                                                                     | 24.9697                                   |             | t                 | 7.4589                                 |             | 14.6946                                |             | 7.2843                                 |             |
| DF                                                                    | 18                                        |             | DF                | 6                                      |             | 6                                      |             | 6                                      |             |
| P value                                                               | < 0.0001                                  |             | P value           | 0.0003                                 |             | < 0.0001                               |             | 0.0003                                 |             |
| Cohen's <i>d</i> for independent groups $d = (M_2 - M_1)/SD_{pooled}$ |                                           |             |                   |                                        |             |                                        |             |                                        |             |
| Cohen's <i>d</i>                                                      | 11.1670                                   |             | Cohen's <i>d</i>  | 5.2744                                 |             | 10.3914                                |             | 5.1517                                 |             |

**Supplementary Table 3. Statistical analysis of K<sub>d</sub> and fatty acid extraction values.**

## SUPPLEMENTARY FIGURES

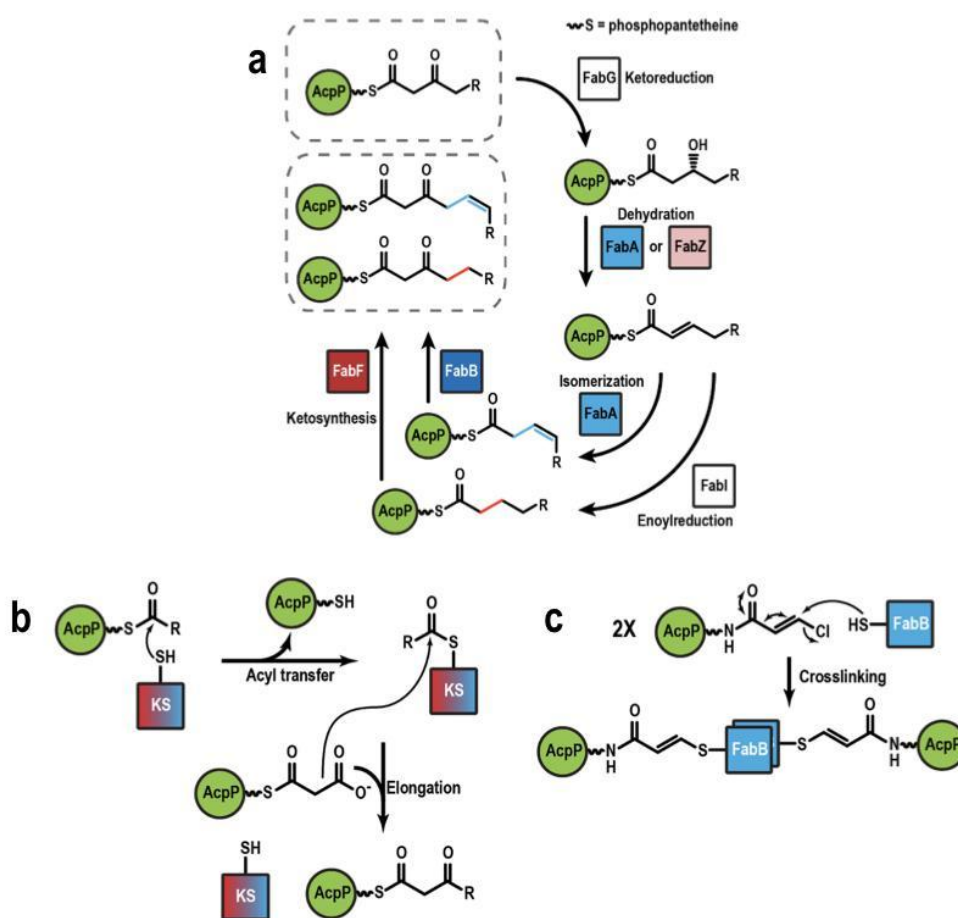

**Supplementary Figure 1. Biosynthesis of fatty acids in *E. coli* and mechanism-based crosslinking.** (a) Overview of biosynthetic pathway. FabA and FabB, in blue, produce and elongate unsaturated fatty acids. FabZ and FabF, in red, produce and elongate saturated fatty acids. FabG and FabI, in white, perform appropriate reductions to complete the cycle. These cycles are iterated to produce full-length fatty acid chains. R = even length acyl chains between 0 and 14 carbons (yielding final products 16 and 18 carbons long) varying in length based on how many upstream iterations of the cycle have already occurred. (b) mechanism for ketosynthase reaction and enzyme turnover. (c) mechanism-based crosslinking reaction.

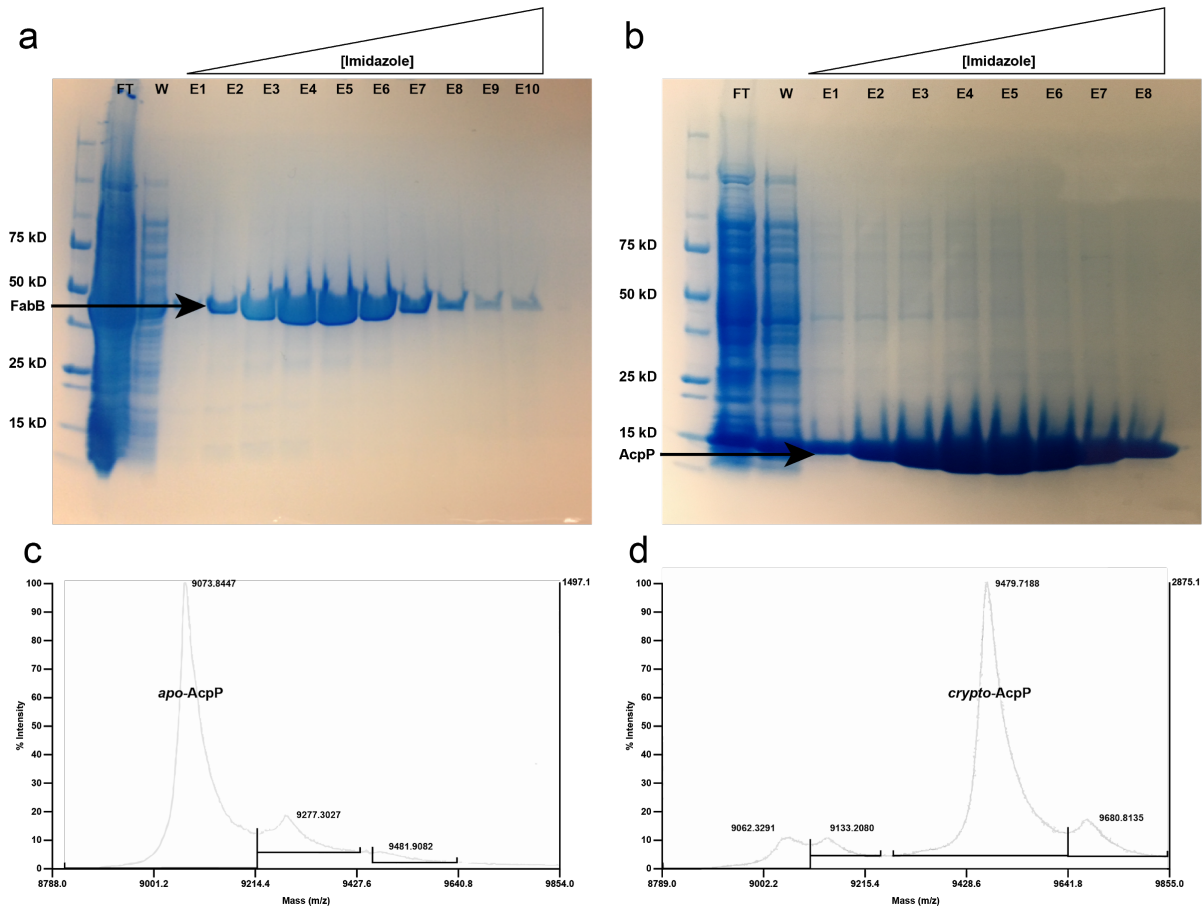

**Supplementary Figure 2. Protein purification and AcpP loading.** (a)(b) SDS-PAGE gels showing fractions from FabB Ni<sup>2+</sup> affinity column (a) and AcpP Ni<sup>2+</sup> affinity column (b). MALDI-TOF mass spectrum of *apo* AcpP (calculated molecular weight of 9052 Da). (d) MALDI-TOF mass spectrum of *crypto* AcpP (calculated molecular weight of 9466 Da).

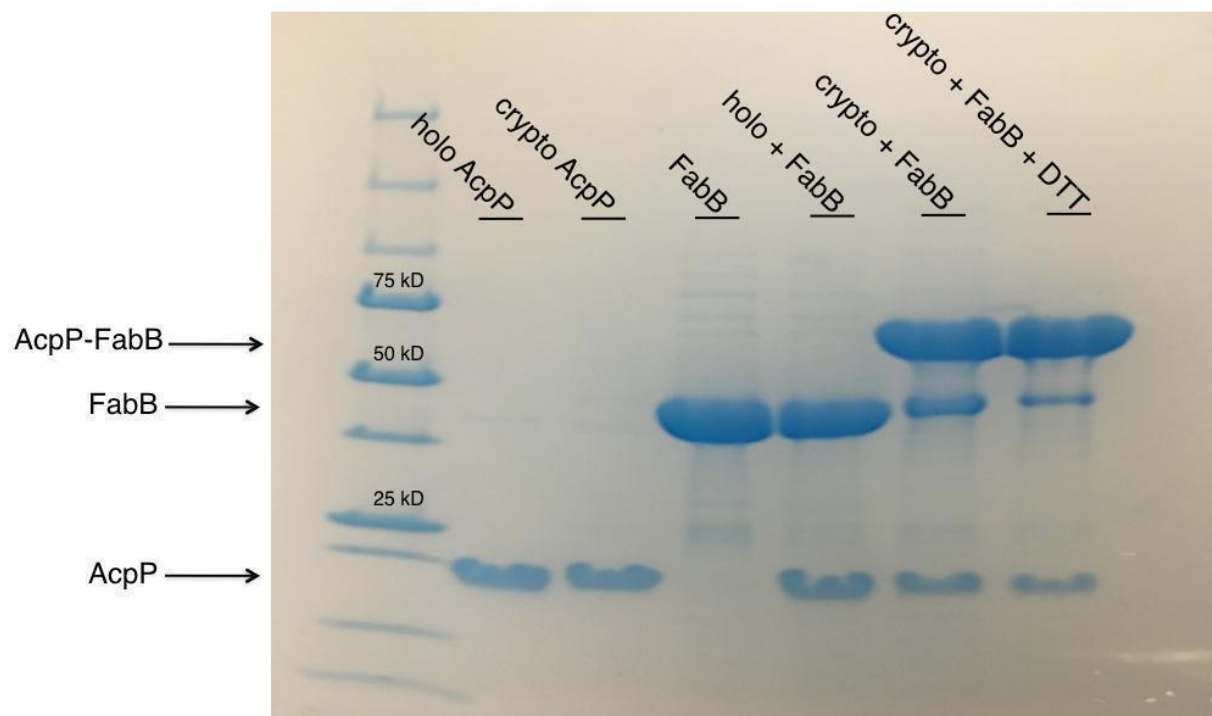

**Supplementary Figure 3. AcpP-FabB crosslinking reaction.** SDS-PAGE gel confirming covalent crosslinking of *crypto* AcpP and FabB. DTT was added to the reaction to maintain an ideal oxidative state for crosslinking.

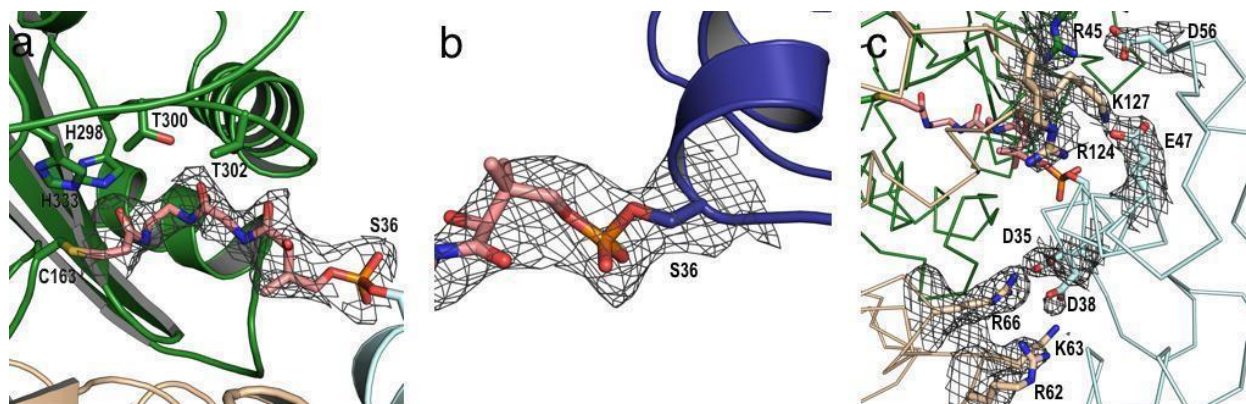

**Supplementary Figure 4. Composite omit maps at 1.0 sigma.** (a) crosslinker in the FabB active site with AcpP shown in light cyan and FabB shown in dark green and light tan. (b) crosslinker connection with AcpP, with AcpP shown in dark blue. (c) AcpP-FabB interface residues.

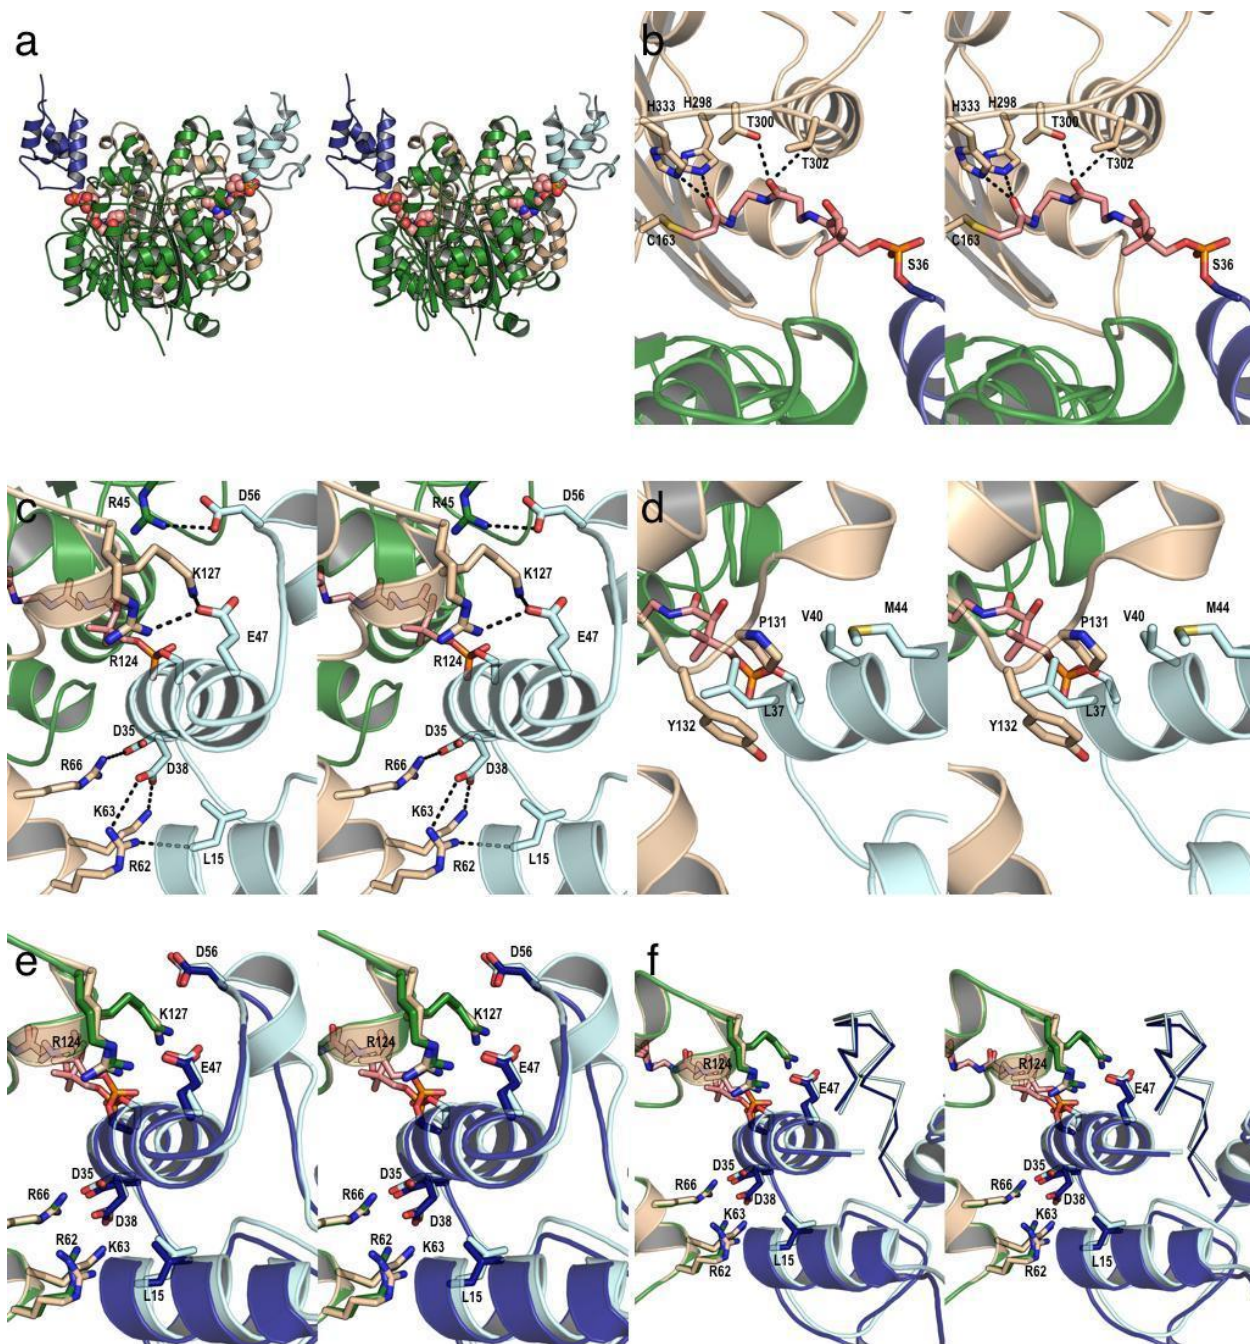

**Supplementary Figure 5. Stereo images of AcpP-FabB structure.** (a) overall structure of the AcpP-FabB complex, with the FabB monomers shown in green and tan, the AcpPs shown in dark blue and cyan, and the crosslinker shown in colored spheres. (b) FabB active site interactions with the crosslinker. (c) AcpP-FabB interface salt bridges. (d) AcpP-FabB interface hydrophobic interactions. (e) overlay of interfaces. (f) overlay of interfaces with helix III shown in ribbon

representation to highlight differences in backbone structure.

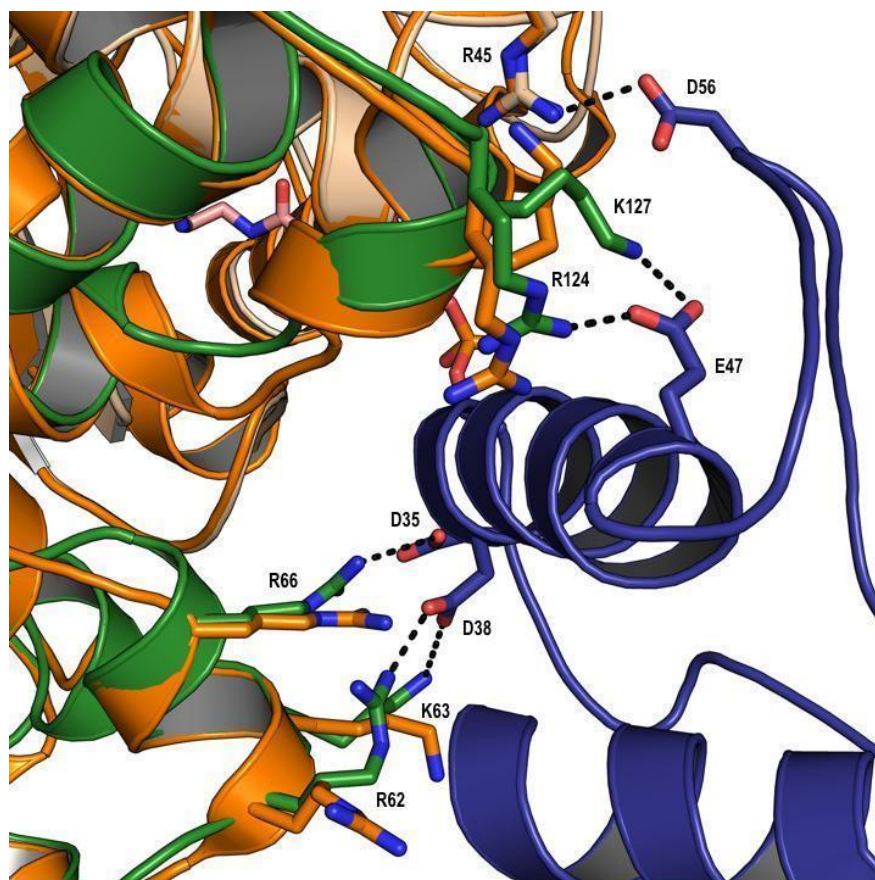

**Supplementary Figure 6. FabB surface changes upon AcpP binding.** Overlay of AcpP-FabB complex structure (green, light tan, and dark blue) with the apo FabB structure (orange).

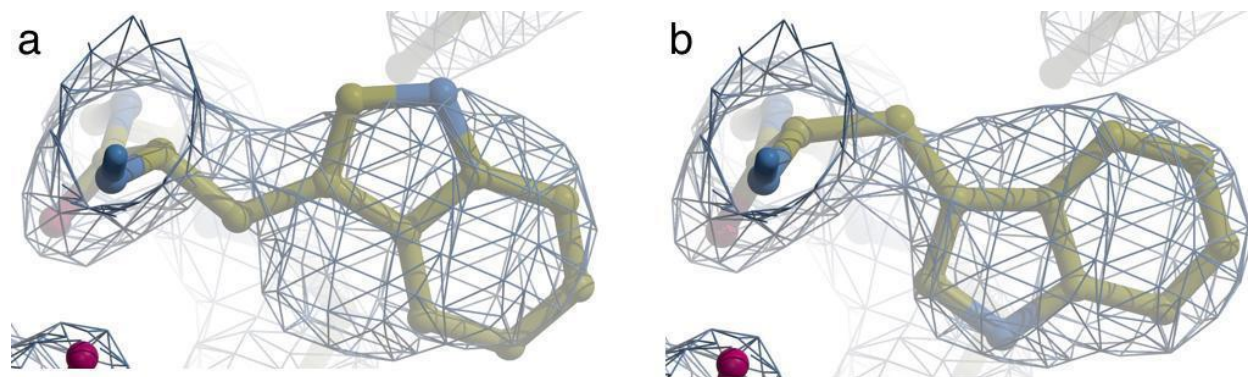

**Supplementary Figure 7. Alternate conformations of Trp 49 in one monomer of FabB. a,** conformation deposited in the PDB. **b,** alternate conformation.

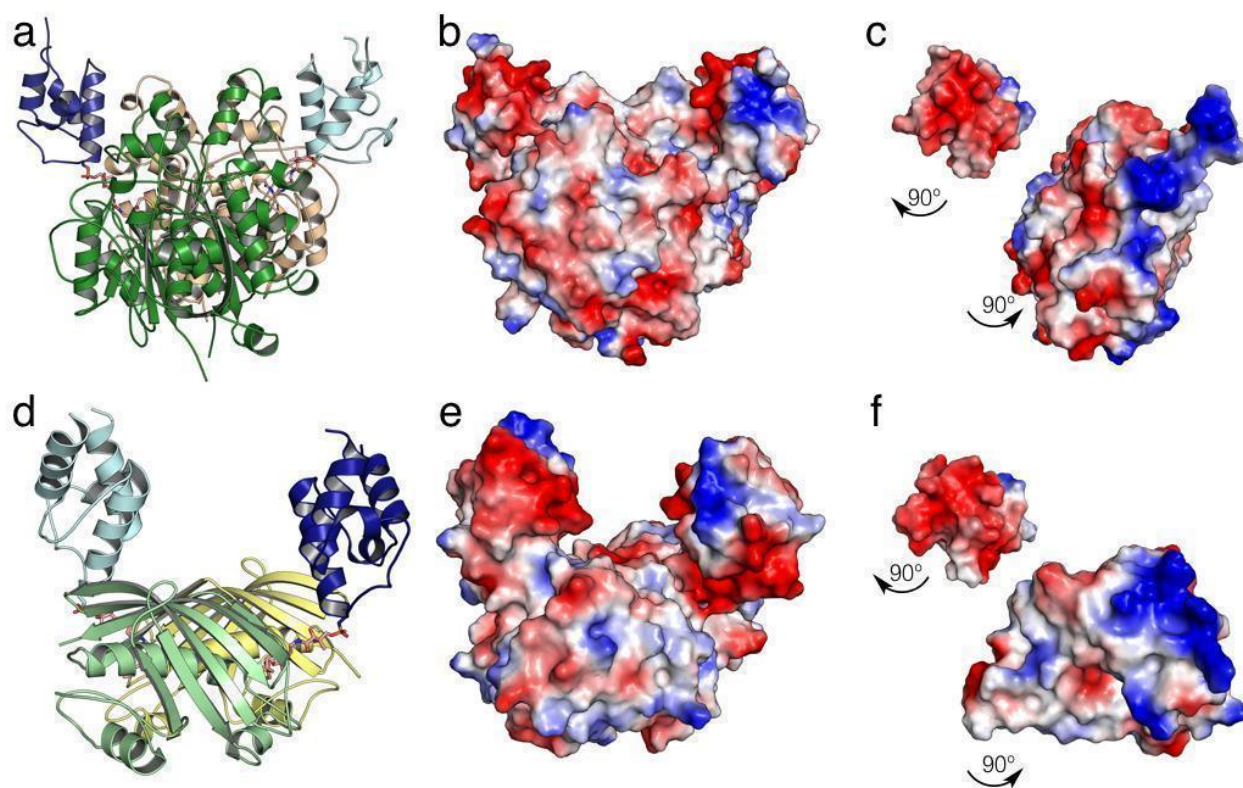

**Supplementary Figure 8. Surface electrostatics of AcpP-FabB and AcpP-FabA.** (a) AcpP-FabB. (b) AcpP-FabB surface charges. (c) surfaces charges at the AcpP-FabB interface. (d) AcpP-FabA. (e) AcpP-FabA surface charges. (f) surfaces charges at the AcpP-FabA interface.

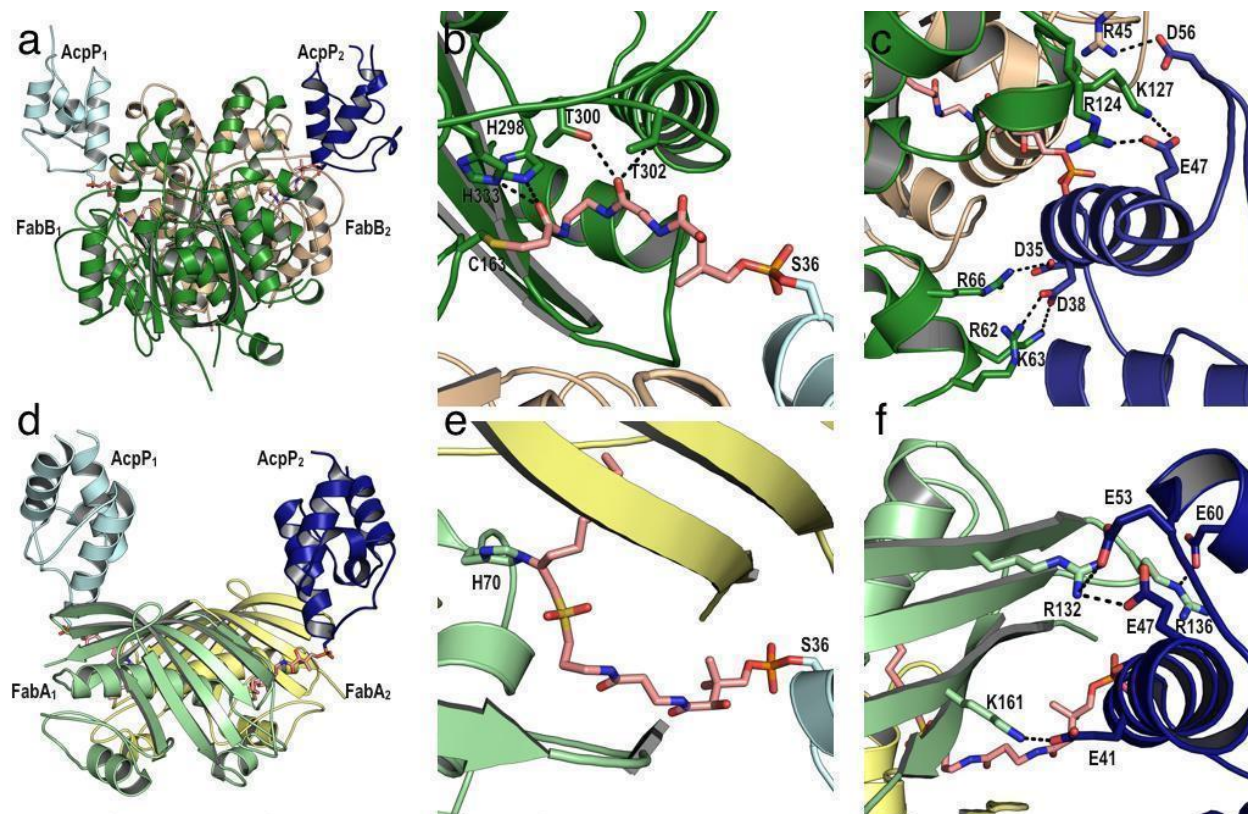

**Supplementary Figure 9. Comparison of AcpP-FabB and AcpP-FabA complex structures.**

(a) Overall AcpP-FabB complex structure, with the FabB monomers shown in dark green and light tan, the AcpP monomers shown in dark blue and light cyan, and the crosslinker in pink. (b) FabB active site interactions with the crosslinker. (c) AcpP-FabB interface. (d) Overall AcpP-FabA complex structure, with the FabA monomers shown in light green and light yellow, the AcpP monomers shown in dark blue and light cyan, and the crosslinker in pink. (e) FabA active site interactions with the crosslinker. (f) AcpP-FabA interface

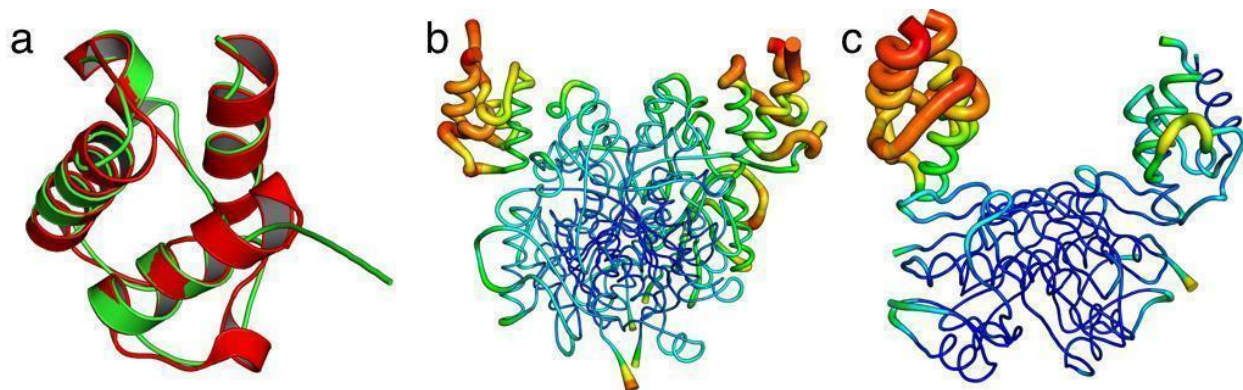

**Supplementary Figure 10. AcpP comparison between AcpP-FabB and AcpP-FabA.** (a) Overlay of AcpP from AcpP-FabA (red) and from AcpP-FabB (green). (b)(c) B-factor putty representation of AcpP-FabB (b) and AcpP-FabA (c) where thin, blue tubes correspond to low B-factors and thicker, darker red tubes correspond to higher B-factors.

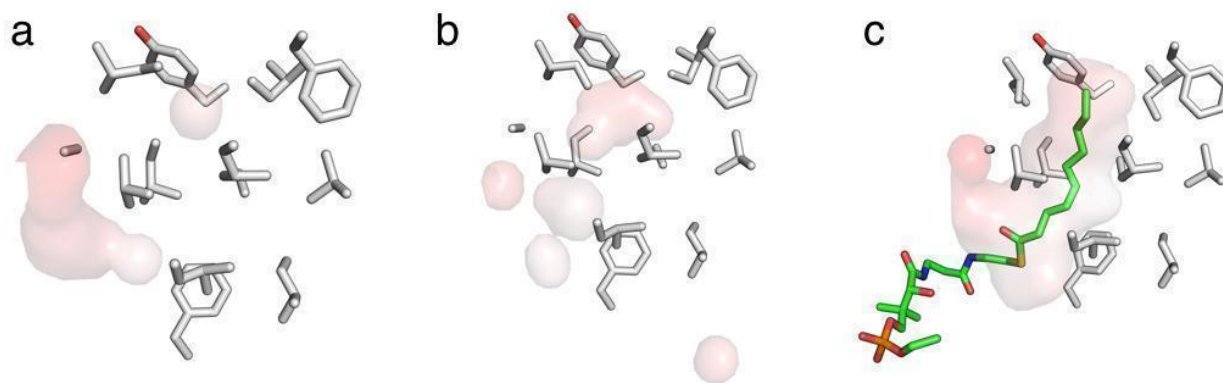

**Supplementary Figure 11. AcpP substrate pocket comparison between AcpP-FabA, AcpP-FabB, and octanoyl-AcpP (2FAE) shows chain flipping and substrate delivery.** (a) AcpP substrate pocket from AcpP-FabA. (b) AcpP substrate pocket from AcpP-FabB. (c) AcpP substrate pocket from octanoyl-AcpP.

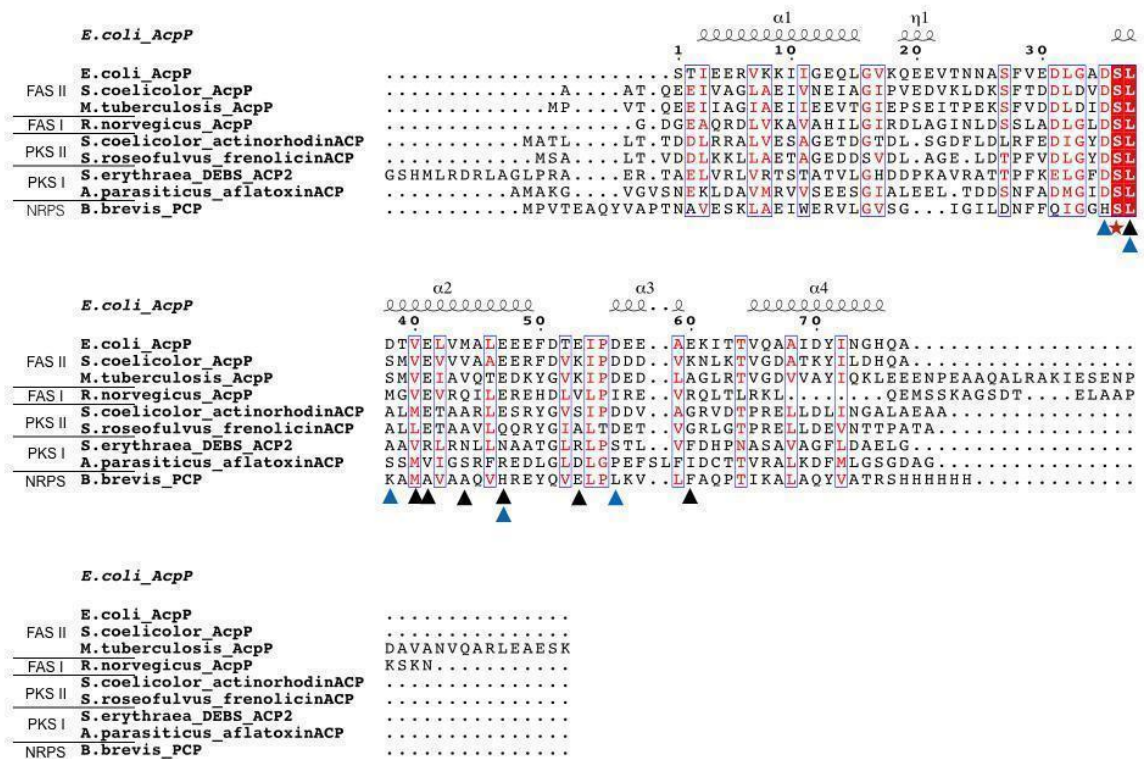

**Supplementary Figure 12. Sequence alignment of carrier proteins.** Red star: PPT attachment site. Black Triangle: AcpP-FabA interface residues. Blue triangle: AcpP-FabB interface residues.

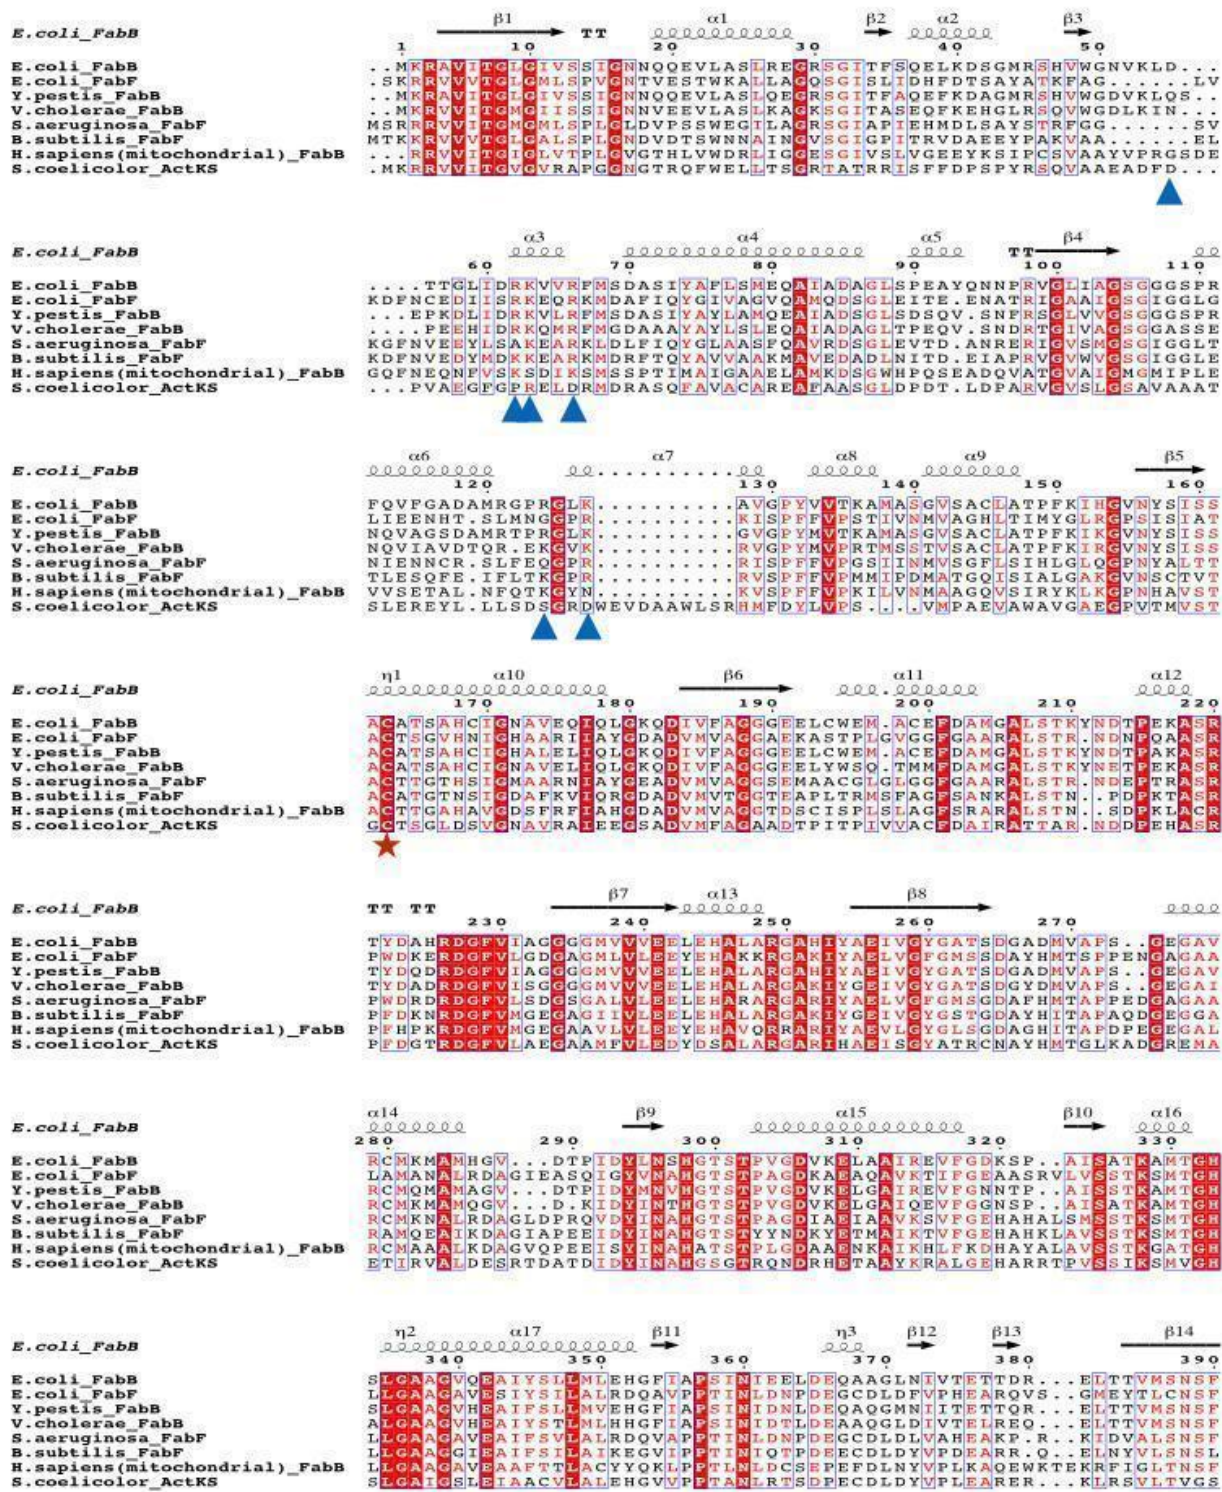

Supplementary Figure 13. Sequence alignment of ketosynthases. Red star: Active site. Blue triangle: AcpP-FabB interface residues.

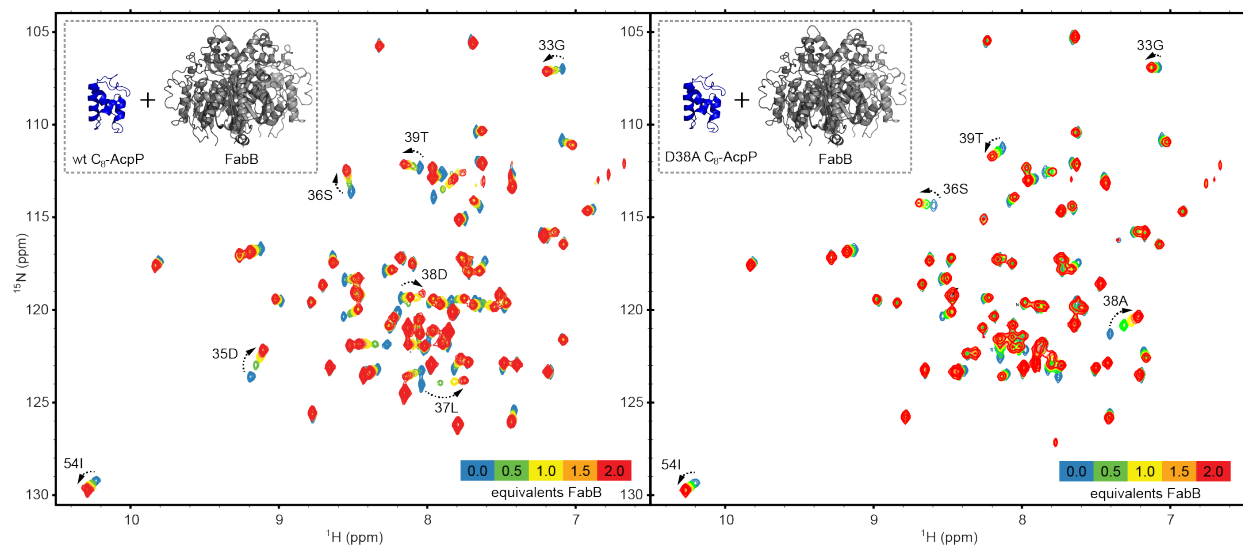

**Supplementary Figure 14. NMR studies of the AcpP-FabB complex.**  $^1\text{H}$ ,  $^{15}\text{N}$ -HSQC titration experiments of wt AcpP (at left) and D38A AcpP (at right) against increasing concentrations of FabB.

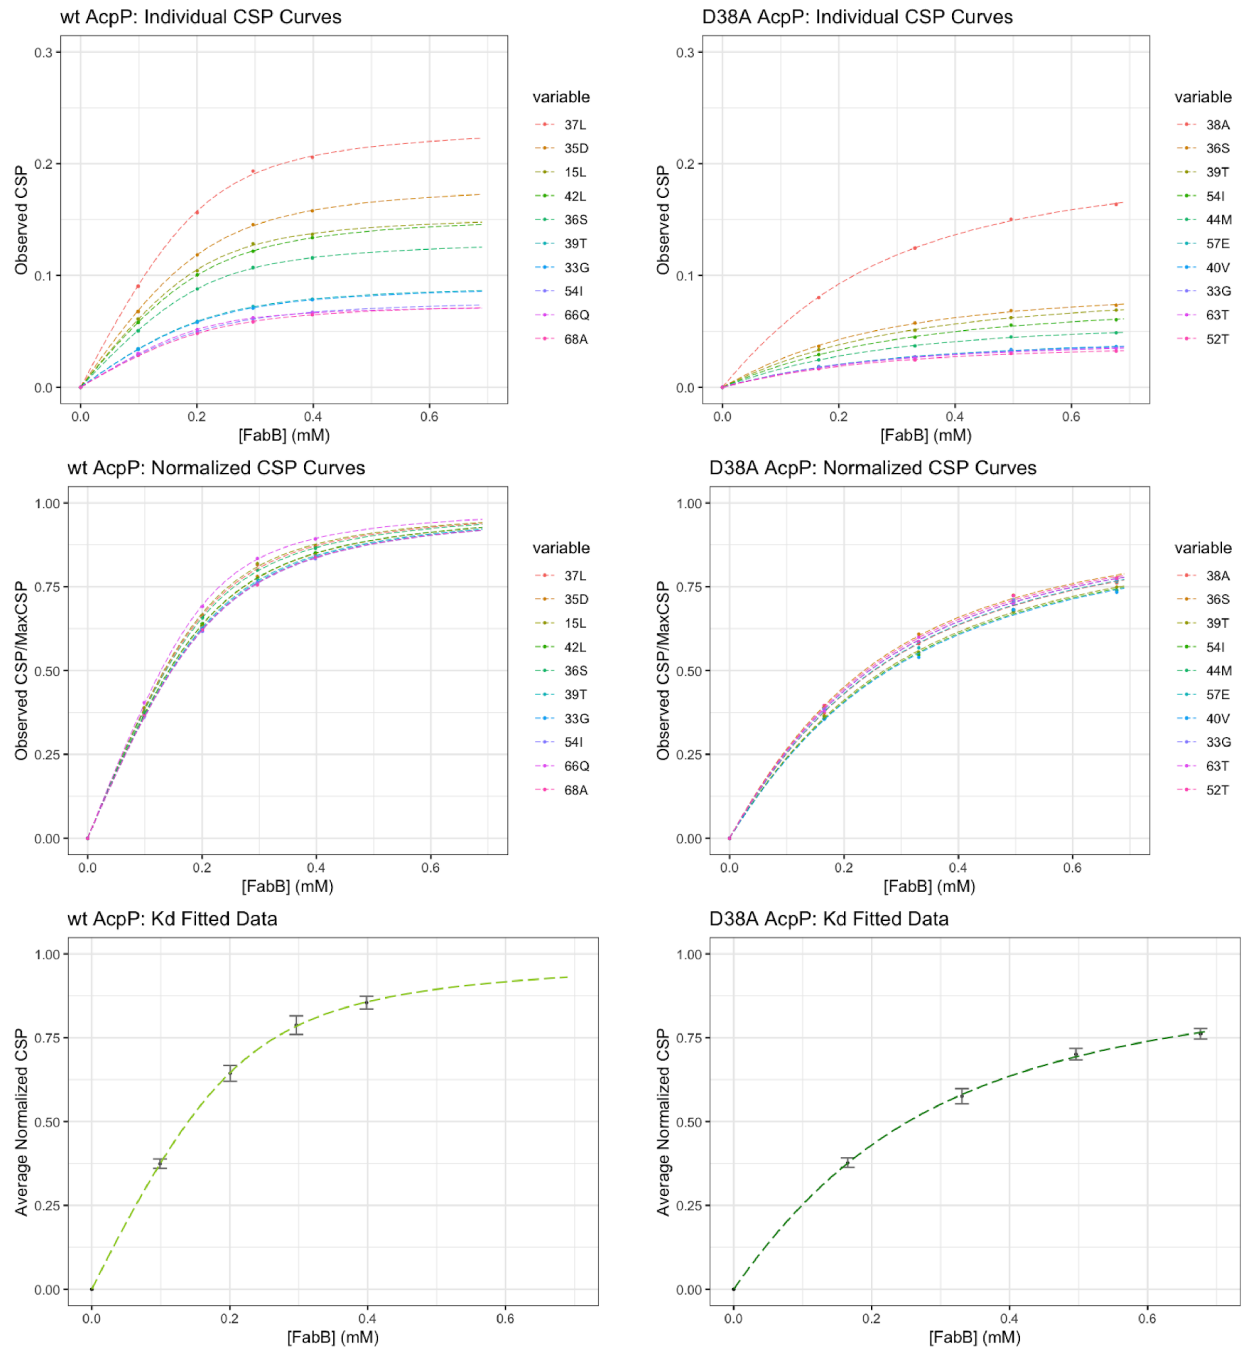

**Supplementary Figure 15. CSP Derived  $K_d$  Curves.** Top: CSP curves for 10 non-aliased residues with the largest observed CSPs for wt and D38A AcpP titrated with FabB. Mid: Normalized CSP curves (Observed CSP/MaxCSP - determined via fitting described in Online Methods). Bottom: Average Normalized CSP curves. Error bars are +/- one standard deviation for normalized CSP value. Observed wt AcpP concentration: 0.21 mM;  $K_d$  calculated to be  $37.6 \pm$

6.6  $\mu\text{M}$ . Observed D38A AcpP concentration: 0.17 mM;  $K_d$  calculated to be  $167 \pm 15 \mu\text{M}$ ,  $P < 0.0001$ .

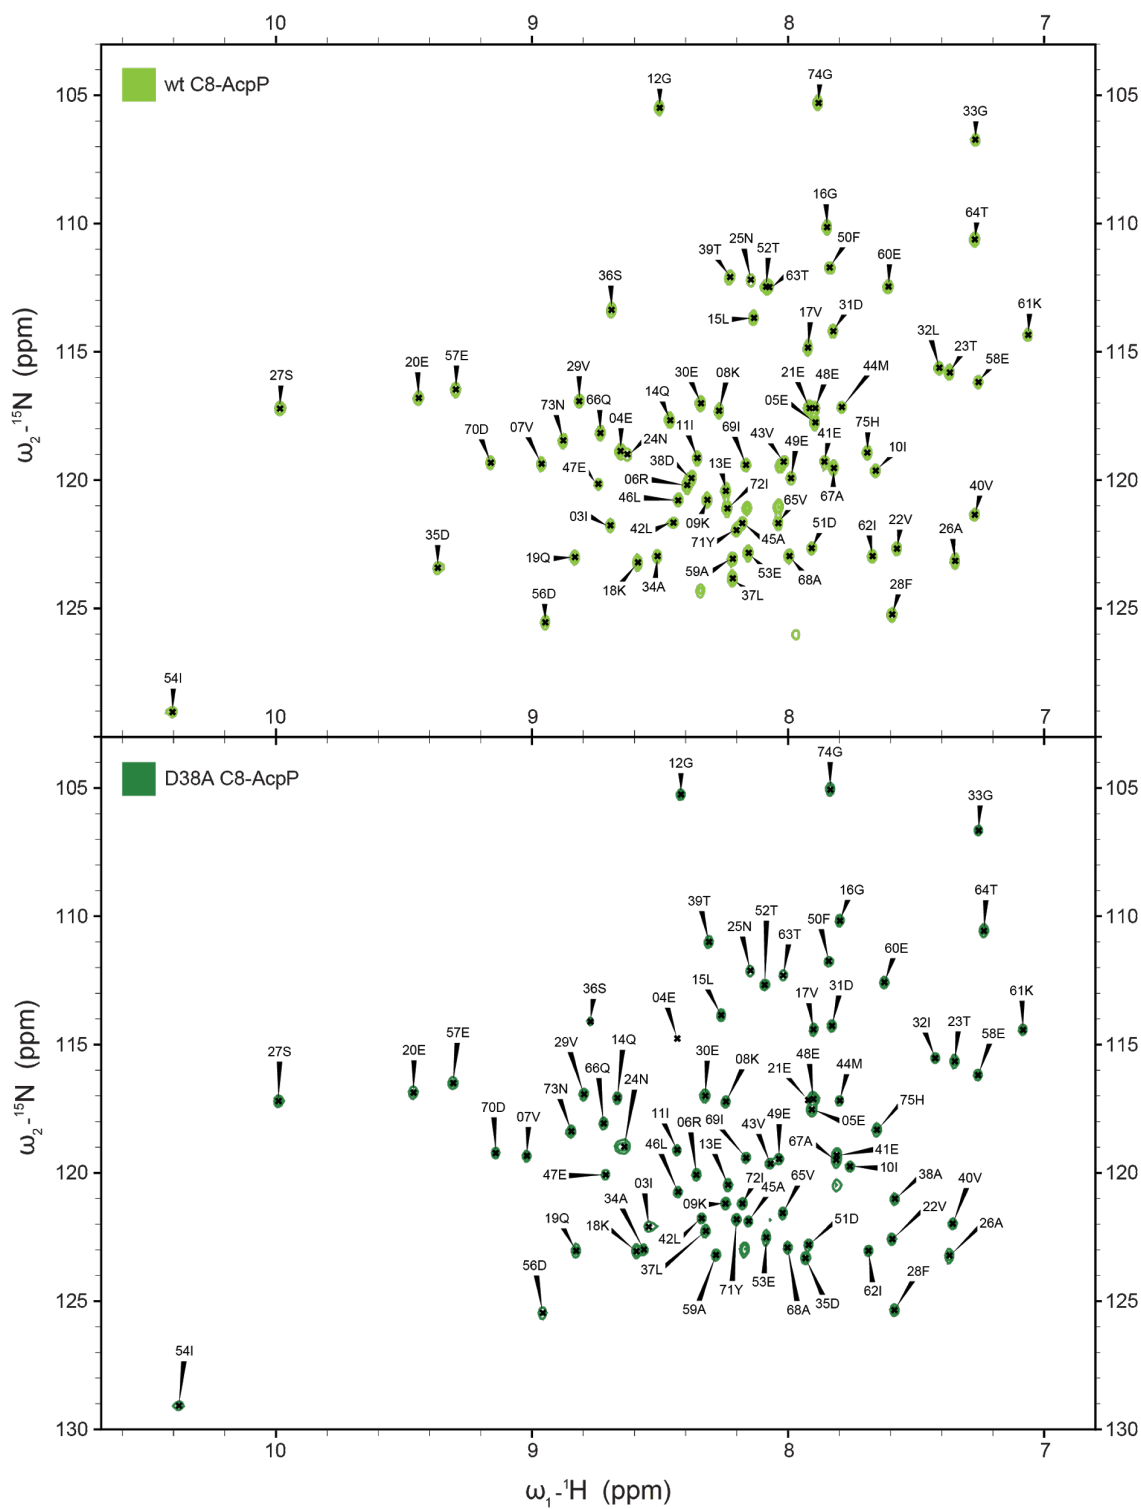

**Supplementary Figure 16.** Assigned  $^1\text{H}$ ,  $^{15}\text{N}$ -HSQC spectra for wt C<sub>8</sub>-AcpP (top) and D38A C<sub>8</sub>-AcpP (bottom) with amide replacement of the phosphopantetheine thioester.

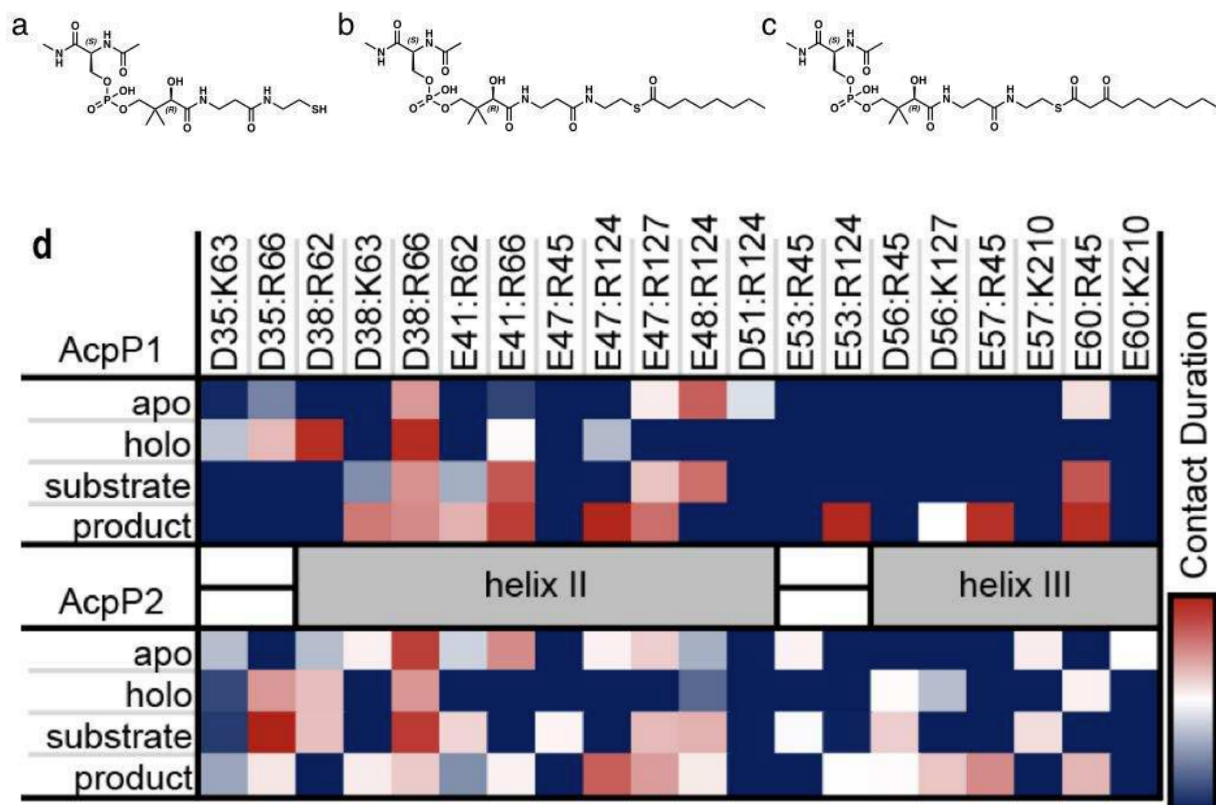

### Supplementary Figure 17. Salt bridge duration in MD simulations of AcpP-FabB

**complexes.** (a) holo-ACP. (b) octanoyl-ACP, “substrate”. (c) 3-oxodecyl-ACP, “product”. These acetyl and N-methyl capped structures were used for force field generation using the R.E.D. Server and Gaussian. (d) The duration of MD-observed salt bridges between different AcpP species and FabB. Contact durations are colored on a spectrum from persisting for 0% of the simulation (blue) to 100% of the simulation (red).

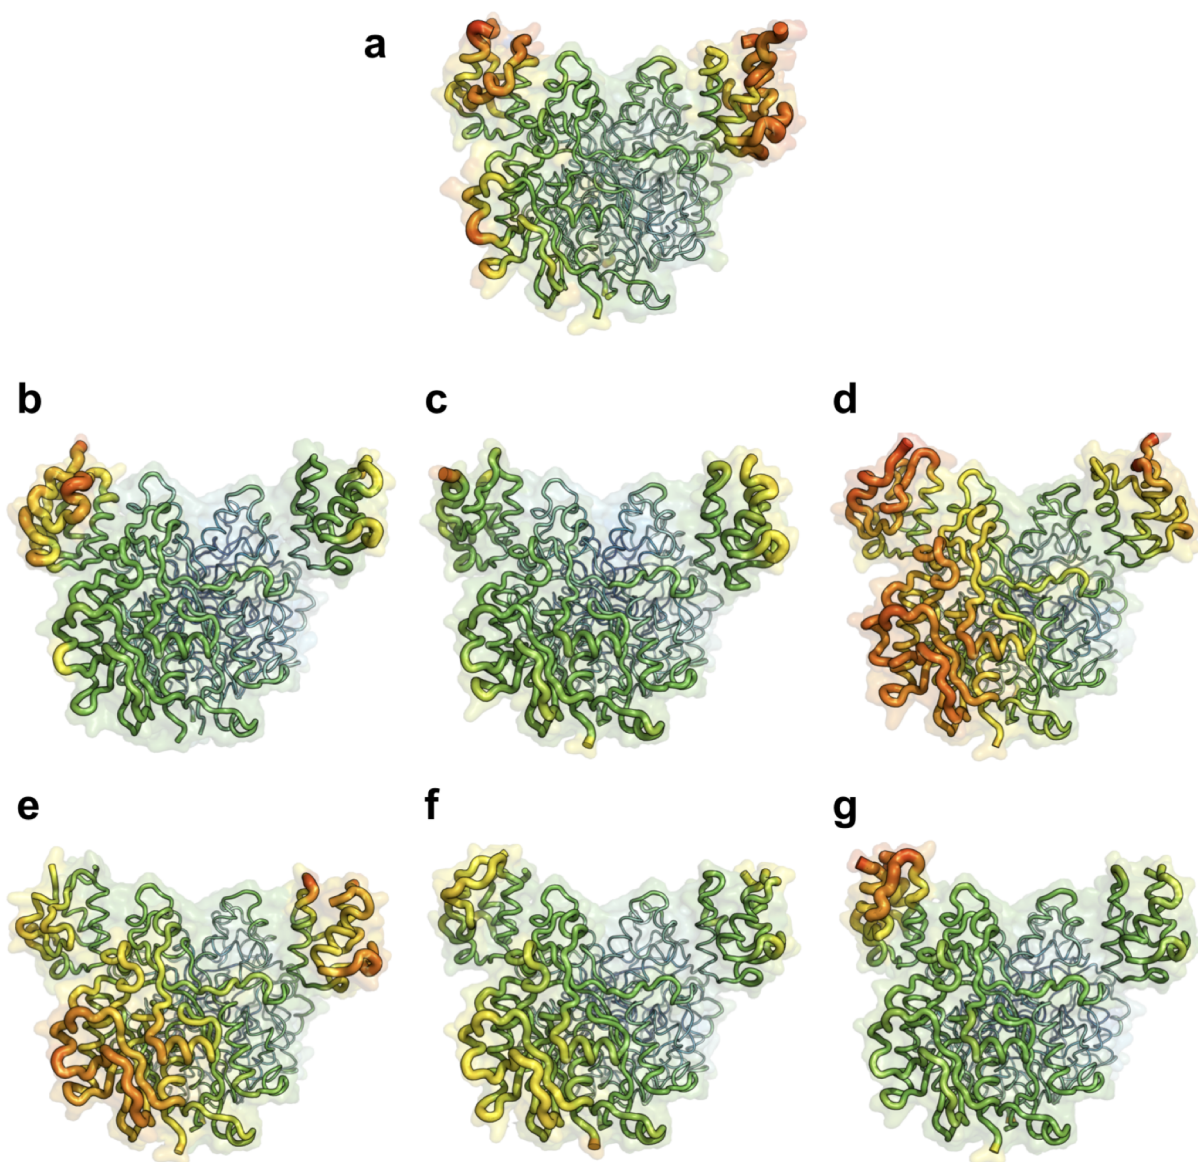

**Supplementary Figure 18. A comparison of MD derived RMSFs and crystallographic B-factors.** All the above structures are displayed as putty, with higher RMSF/ B-factor values shown in red with increased thickness, and lower values shown in blue with decreased thickness. All MD structures are the average structure generated from the 1000 frames representing 140 to 150 ns. The RMSF MD structures are normalized with the crystallographic B-factors for comparison purposes. (a) Crystallographic structure for reference. Higher disorder is observed in FabB2 of the homodimer. (b) Both AcpPs in apo state. (c) Both AcpPs loaded with C8-substrate. (d) AcpP1

(left) and AcpP2 (right) loaded with C8-substrate and C8-product, respectively. (e) Both AcpPs in holo state. (f) Both AcpPs loaded with C8-product. (g) AcpP1 (left) and AcpP2 (right) loaded with C8-product and C8-substrate, respectively.

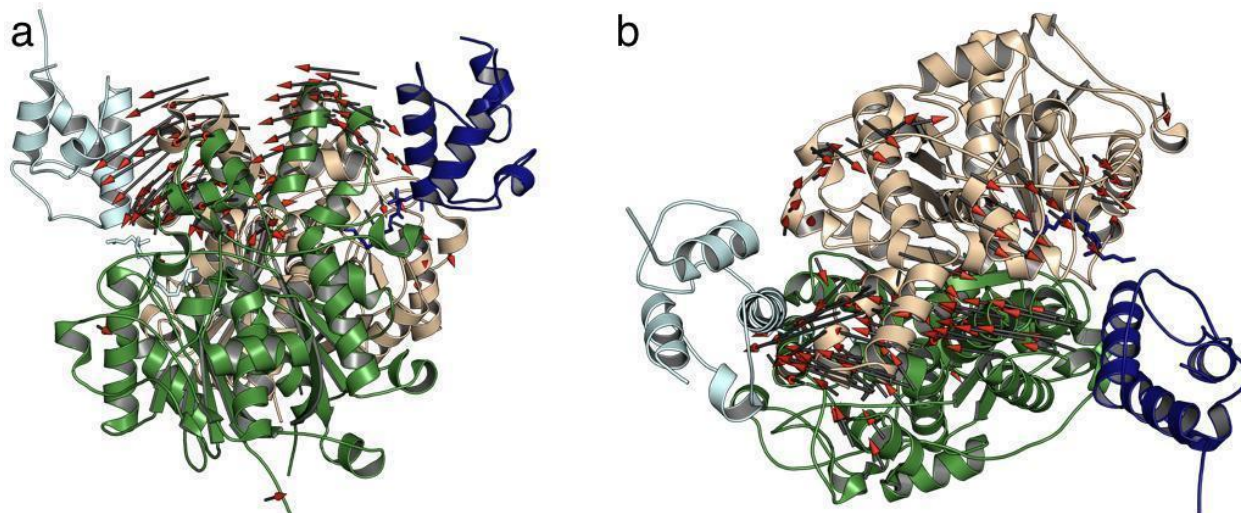

**Supplementary Figure 19. Porcupine figures showing the symmetric rocking motion obtained from the trajectory of the first mode from the principal component analysis.** The vectors were generated using the beginning and final structures of the first mode trajectories, and the vectors were overlaid on the crystal structure for ease of visualization.

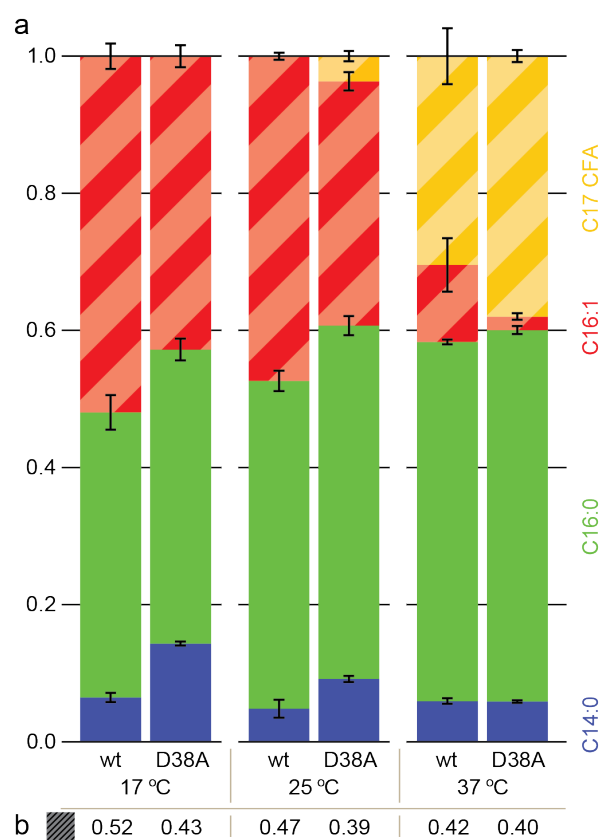

**Supplementary Figure 20.** (a) Specific isolated fatty acids reported in figure 3c. Averages are over four replicates for each condition. (b) Unsaturated fatty acid fraction, including cyclopropyl-C17 (derived from C16:1).

## **SUPPLEMENTARY MOVIES**

### **Movie S1. Principal component analysis of AcpP-FabB molecular dynamics simulations.**

The movie shows the first three modes from the principal component analysis. Mode 1 is a twisting of the AcpPs along the center axis of the FabB homodimer. Mode 2 is a scissoring of the AcpPs along the same axis. Mode 3 is wagging of the AcpPs along the same axis. The two FabB monomers are shown in dark green and light tan, and the two AcpPs are shown in light cyan and dark blue.

### **Movie S2. Principal component analysis of AcpP-FabB molecular dynamics simulations.**

The same results shown in Movie S1 are shown again from a perpendicular viewing angle.
